# Supplementary material for: Long-Term Safety and Immunogenicity of a Tetravalent Live-Attenuated Dengue Vaccine and Evaluation of a Booster Dose Administered to Healthy Thai Children
Source: PubMed Central journal article supplement (PMC4889756; doi:10.4269/ajtmh.15-0659), 2016-06-01
Supplement: SD7.pdf [file SD7.pdf]

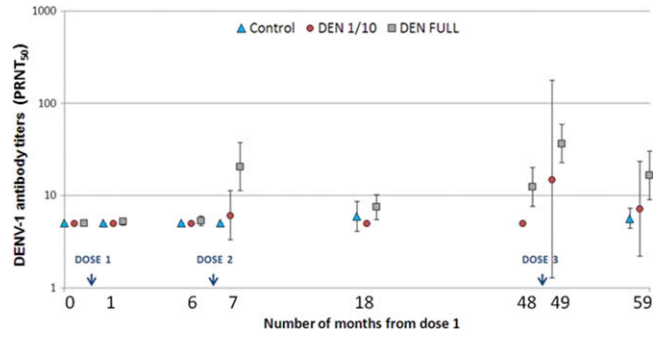

SUPPLEMENTAL FIGURE 1. Infant study: Evolution of DENV-1 neutralizing antibody GMTs with 95% CI.

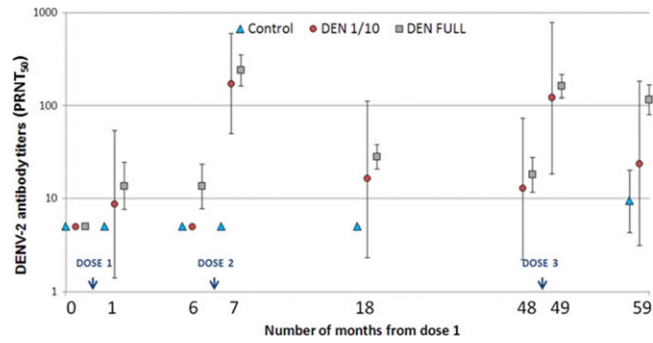

SUPPLEMENTAL FIGURE 2. Infant study: Evolution of DENV-2 neutralizing antibody GMTs with 95% CI.

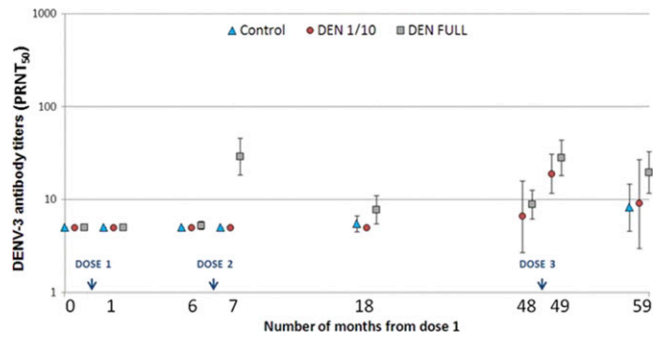

SUPPLEMENTAL FIGURE 3. Infant study: Evolution of DENV-3 neutralizing antibody GMTs with 95% CI.

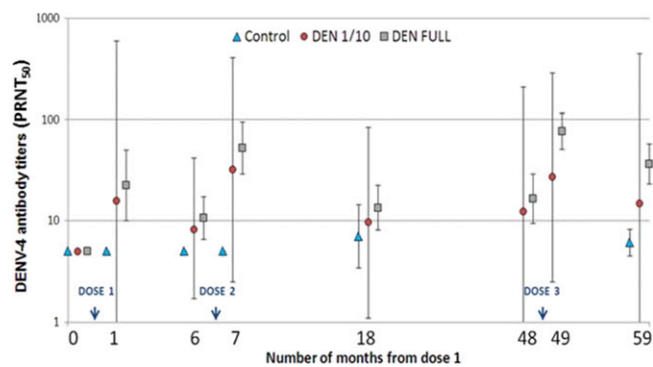

SUPPLEMENTAL FIGURE 4. Infant study: Evolution of DENV-4 neutralizing antibody GMTs with 95% CI.
